# Supplementary material for: Design of topical nanostructured lipid carrier of silymarin and its effect on 7,12-dimethylbenz[a]anthracene (DMBA) induced cellular differentiation in mouse skin
Source: Royal Society of Chemistry journal article supplement (doi:10.1039/c6ra20231d), 2016-01-01
Supplement: c6ra20231d1.pdf [file c6ra20231d1.pdf]

I

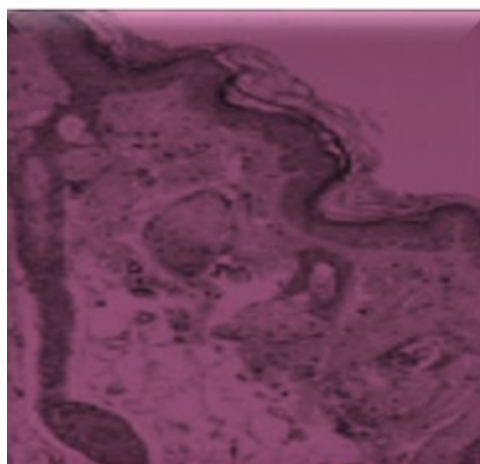

II

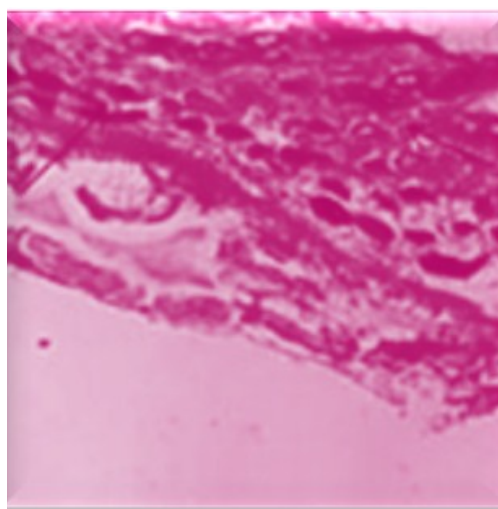

**Supplementary Figure 1:** Histological Photographs of Group II and IV animals respectively; (I) DMBA treated mouse skin (II) DMBA+ NLC treated mouse skin
